# Supplementary material for: Revalidation of Mazama rufa (Illiger 1815) (Artiodactyla: Cervidae) as a Distinct Species out of the Complex Mazama americana (Erxleben 1777)
Source: Front Genet. 2021 Dec 14;12:742870. doi: 10.3389/fgene.2021.742870 (PMC8712859; doi:10.3389/fgene.2021.742870)
Supplement: Supplementary file 2 [file Table3.XLSX]

## Sheet: T385 Neotype Measures
Skull Variables (mm)	Abreviation	T385	Biometry Variables (cm and kg)	T385
total length	TL	221.61	Head length	226
condilobasal length	CBL	209.37	Head width	90.5
basal length	BL	194.46	Ear length	103
short skull length	SSL	122.72	Between eyes	52.5
premolare – prostion	PR	62.39	Mandible	76.5
basecranial axis	BCA	43.28	Neck circumference	305
basefacial axis	BFA	153.49	Thorax circumference	690
viscerocranium length	VL	97.64	Height	645
median frontal length	MFL	128.45	Metacarpus length	163
lambda – nasal	LN	125.35	Body length	952
lambda – Rhinion	LR	183.18	Abdomen circumference	843
lambda – prostion	LP	210.53	Metatarsus length	257
akrokranium	AK	139.78	Tail length	153
greatest length of the nasals	GLN	59.19	Mass (kg)	33.7
short lateral facial length	SLFL	116.88
oral palatal length	OPL	101.87
lateral length of the premaxilla	LLP	51.33
length of the cheektooth row	LCR	63.2
length of the molar row	LMR	32.17
length of the premolar row	LPR	28.73
greatest inner length of the orbit	GILO	33.58
greatest inner height of the orbit	GIHO	37.55
greatest mastoid breadth	GMB	60.91
greatest breadth of the occipital condyles	GBOC	41.55
greatest breadth at the bases of the paraoccipital	GBBP	55.6
greatest breadth of the foramen magnum	GBFM	20.54
Height of the foramen magnum: Basiom - Opisthion	HFM	20.03
Greatest neurocranium breadth	GNB	58.98
Least frontal breadth	LFB	66.3
greatest breadth across the orbits	GBAO	81.82
least breadth between the orbits	LBBO	54.22
zygomatic breadth	ZB	98.99
greatest breadth across the nasals	GBAN	22.97
greatest breadth across the premaxillae	GBAP	27.44
greatest palatal breadth	GPB	61.06
Basion – The highest point of the superior nuchal crest.	BHPSN	67.51

## Sheet: Descriptive Analysis
Skull Variable	n	Mean	SD	Min	Max	Biometry Variable	n	Mean	SD	Min	Max
CT	26	201.92	24.82	162.81	255.5	Head length	31	23.06	2.88	16	27
CCB	25	194.11	26.53	140	224.82	Head width	32	8.98	1.04	6.85	10.35
CB	25	177.06	22.75	130.01	203.51	Ear length	32	9.68	0.97	7.2	11.4
CCC	26	116.13	13.34	87.02	137.02	Between eyes	32	5.25	0.62	4.05	6.55
PP	26	60.76	10.07	41.3	78.78	Metacarpus length	32	13.81	2.51	9	23
EBC	24	30.17	4.33	21.4	43.28	Height	32	58.53	7.7	36	71
EBF	25	149.85	19.22	112.31	177.01	Body length	32	84.49	12.76	51.5	100
LN	27	104.94	9.49	88.02	125.35	Tail length	29	12.27	2.92	6.5	17.5
LR	27	164.07	17.25	133.7	184.5	Metatarsus length	32	21.95	3.12	14	26.5
LP	25	194.38	21.56	157.33	225.3	Neck circumference	32	30.56	5.65	20	46.5
ACR	27	138.41	13.59	117.06	161.24	Thorax circumference	32	65.91	9.78	48	78
DCD	27	58.46	6.29	45.02	68.87	Abdomen circumference	21	68.75	11.55	46	89
CLP	27	27.11	3.4	20.56	31.61	Mass	26	28.59	12.04	6.7	47
MCIO	27	32.34	2.4	28.53	36.65
MAIO	27	34.67	3.32	27.77	41.18
MLM	26	61.33	7.05	45.1	70.24
MLCO	26	37.85	3.33	32.54	44.08
LZ	27	87.78	9.39	71.98	100.97
MLEN	27	21.17	3.58	13.21	28.88
MLPM	26	25.78	4.16	17.3	37.22
MLPP	26	54.72	5.29	45.2	62.12
MLFM	26	18.51	2.02	14.08	22.27
AFM	22	18	1.86	15.02	21.97
MLNC	22	60.32	4.02	50.92	65.99
CVC	26	94.4	15.53	57.81	119.03
CFM	27	115.71	8.85	101.03	128.45
MCN	26	59.45	8.37	42.12	71.28
CCFL	25	102.02	14.73	77.45	123.72
CPO	26	89.1	13.25	64.92	111.44
CLP.1	25	49.68	8.1	34.65	61.19
CLM	27	33.1	3.78	26.34	39.61
LFM	26	59.35	8.1	47.51	74.22
MLEO	26	76.69	5.99	65.01	84.59
LMEO	27	51.35	4.43	43.62	58.74
MLP	25	58.07	5.64	50.15	70.44
BCNS	26	54.49	12.54	37.01	84.26

## Sheet: Biometry Dataset
Species Id	M. americana Cytotype	Voucher Id	Head length	Head width	Ear length	Between eyes	Mandible	Metacarpus length	Height	Body length	Tail length	Metatarsus length	Neck circumference	Thorax circumference	Abdomen circumference	Mass
M americana	Carajás	T039	26.5	10.3	10.5	6.55	8.65	15	66.5	100.00	17.5	25	35	72		40
M americana	Carajás	T043	25	9.4	10.5	5.6	7.6	14	57	96	12	22.5	31	76.5		35
M americana	Carajás	T167	24.5	9.9	11	5.75	8.15	14	60.5	95	14.5	23.5	33.5	67.5	80
M americana	Carajás	T232	26	9.9	10.5	5.2	8.3	14	68.5	93.5	13	25	46.5	76.5		38
M americana	Carajás	T274	26	9.75	10.3	5.7	8.55	15	62.5	100	17	24.5	32	70		35.2
M americana	Carajás	T311	26.3	10.25	11.4	6.1	8.5	15.5	63	88	12	24.5	37.5	76	84	47
M americana	French G._Type	T358	27	10	10.5	6		16	71	96	12.5	26.5	36	78		44
M americana	Juína	T247	24	8.9	9	5.1	7.55	14	63.5	89	13	24	34.5	70.5	78.5
M americana	Juína	T248	22.5	8.4	8.5	4.65	7.4	12.5	55	78	13.5	22	31	64	70.5
M americana	Juína	T251	22	8.8	10.4	5	7.3	14	60	86.5	13.5	22.5	30	65.5	70	25.7
M americana	Juína	T253	22.5	8.85	10.3	4.7	8.15	23	57	82	14	14	29	63	70	25.5
M. rufa	Paraná	T104	24.5	9.9	10.5	5.95	9.15	15	66.5	90	14	23	38	75		39.5
M. rufa	Paraná	T205	23.5	9.85	10.5	5.9	8.25	15.5	61	85.5	15	24.5	30	68.5	73.5	30
M. rufa	Paraná	T255	25	9.65	10.5	5.35	8.3	15.5	64.5	97	14	24.5	35	75		40.8
M. rufa	Paraná	T257	25.5	10.35	10	5.6	8	16	67.5	96	15.5	25	34	77	89	42
M. rufa	Paraná	T268	25	9.5	9.5	6.15	7.3	14.5	64	97	12.5	23.5	28	70.5		33
M americana	Paraná_Type	T385	22.6	9.05	10.3	5.25	7.65	16.3	64.5	95.2	15.3	25.7	30.5	69	84.3
M americana	Rondônia	T206	25.5	10.1	9.5	5.7	8.35	14	60	97	9.5	23	35	74.5
M americana	Rondônia	T211	23.5	8.8	9	5.1	7.6	14.5	60	89	10	22	31	72	78	33
M americana	Rondônia	T269		9.75	9	5.45	7.7	14.5	64	90	12	24	33	70		34.95
M americana	Rondônia	T342	27	10	10.4	5.72	8	14.5	66	93.5	16	24	32.5	78		43.3
M bororo	.	T064	20.5	8.15	9.5	4.4	7.1	12	51.5	74.5	8	20	25	57	64	17
M bororo	.	T071	24	8.9	10	5	7.7	13	57.5	83.5	10	22	32	68	76	26
M bororo	.	T204	19.5	7.35	8.5	4.15	6.3	11	48.5	63	10	19.5	23	48	55	12.5
M bororo	.	T340	23	8.65	10	5.15	7	11.5	55.5	80.5	9	21	31	62	71	25.1
M nana	.	T002	19	7.8	8.5	4.75	5.8	10	50	71	7	17.5	26	54	58	14.9
M nana	.	T053	21	8	9.3	4.7	5.6	11	53	75.5	9	18.2	27	57	58
M nana	.	T114	18	6.85	9.5	4.25	5.8	12	50	67	10	20	21	49	56.5	12
M nana	.	T185	16	7.1	7.2	4.05	5.6	9	36	51.5	6.5	15	20	49.5	46	6.7
M temama	.	T362	20	7.4	8.5	5.15	6.4	12	51.5	74		19.5	23	53	64	15.7
M temama	.	T363	19.5	8.3	8.5	5	7.1	11.5	49	65		18	24	53.5	64	15.2
M temama	.	T366	20	7.5	8.2	4.9	6.1	11.7	48	64		18.5	23	49	53.5	11.6

## Sheet: Skull Dataset
Species Id	M. americana Cytotype	Voucher Id	Museum Id	CT	CCB	CB	CCC	PP	EBC	EBF	CVC	CFM	LN	LR	LP	ACR	MCN	CCFL	CPO	CLP	DCD	CLM	CLP	MCIO	MAIO	MLM	MLCO	MLPP	MLFM	AFM	MLNC	LFM	MLEO	LMEO	LZ	MLEN	MLPM	MLP	BCNS
M americana	Carajás	T254	NPC016	201.47	199.72	185.96	124.67	61.60	23.96	151.27	98.80	118.05	99.99	164.77	191.02	137.45	60.20	101.16	89.35	52.81	54.52	30.13	23.73	33.24	34.04	62.32	36.52	54.00	17.50	17.87	58.27	50.10	74.61	54.97	90.01	22.63	22.67	50.76	57.43
M americana	Carajás	T274	NPC110	220.74	219.45	187.43	121.52	68.13	27.26	172.07	104.72	127.52	103.53	175.89	212.73	152.61	65.07		102.61		63.42	34.39	30.86	31.44	39.67	69.32	37.92	57.62	18.73	15.83	59.80	68.34	80.93	57.12	97.93	23.06	27.67	61.27	51.06
M americana	French G._Type	T358	NPC079	223.19	222.99	197.33	137.02	61.87	27.27	170.50	119.03	115.38	103.44	172.54	212.02	151.73	71.00	116.10	99.14	61.17	68.87	37.77	30.16	30.22	37.31	66.28	41.46	60.14	18.18	19.18	63.13	66.65	84.59	46.16	100.97	21.35	28.10	70.44	50.42
M americana	Juína	T247	NPC147	220.18	209.83	192.99	124.24			159.57	103.05	124.42	107.49	172.49	205.13	152.64	67.49	113.14	96.43	51.82	60.61	33.30	30.42	33.29	37.32	64.82	41.69	62.11	19.18	18.29	65.53	66.34	79.44	55.75	89.36	26.13	31.24		50.4
M americana	Juína	T251	NPC007	210.53	209.02	189.66	125.24	66.41	37.52	153.12	104.62	117.97	106.62	172.27	204.81	144.87	66.18	111.23	87.92	59.10	65.40	38.23	30.34	35.36	36.12	64.33	41.92	62.12	19.53	19.17	62.10	68.98	82.65	54.92	91.78	17.44	22.61	60.79	61.28
M americana	Juína	T252	NPC069	223.07	224.82	199.92	123.42	76.68	32.07	171.47	113.71	119.04	110.40	178.67	217.42	152.70	71.28	115.89	105.28	57.43	63.18	35.79	28.79	31.95	33.90	67.29	38.68	56.20	21.53	16.47	63.82	50.02	79.77	50.32	94.44	21.76	27.23	64.17	68.29
M americana	Juína	T253	NPC073	207.59	208.26	183.61	115.27	66.88	30.46	155.36	98.68	117.68	104.62	180.74	206.9	140.81	62.35	104.86	92.95	50.57	60.17	32.15	29.59	36.51	35.81	64.50	36.3	58.98	16.76	19.70	60.80	57.52	81.77	51.59	90.92	20.43	26.58	60.11	60.80
M. rufa	Paraná	T205	NPC126	216.69	214.96	190.88	114.68	72.11	29.40	157.87	103.39	120.91	106.31	171.44	204.73	148.53	64.38	109.92	101.53	49.55	60.78	35.04	30.78	36.65	38.45	70.24	39.45	56.89	14.08	21.97	65.87	74.22	82.68	52.98	100.48	28.88	37.22	67.39	49.84
M. rufa	Paraná	T255	NPC149	255.50	217.22	192.99	124.24	73.70	26.01	160.72	109.91	121.03	109.13	180.47	215.37	153.06	69.36	116.81	97.80	60.65	59.09	31.77	26.46	33.56	34.69	69.33	39.21	61.19	20.11	20.12	65.99	62.28	82.36	57.75	100.32	26.11	29.98	61.57	53.34
M. rufa	Paraná	T268	NPC034	222.69	210.12	198.08	130.83	65.57	30.64	167.79	110.13	121.93	110.17	180.29	215.08	152.66	70.60	119.72	96.69	61.19	67.14	37.97	30.95	32.07	33.47	64.48	42.92	59.06	20.47	17.45	63.47	59.29	77.05	52.18	91.92	19.76	23.66	57.19	69.69
M. rufa	Paraná _Type	T385	NPC118	221.61	209.37	194.46	122.72	62.39	43.28	153.49	97.64	128.45	125.35	183.18	210.53	139.78	59.19	116.88	101.87	51.33	63.2	32.17	28.73	33.58	37.55	60.91	41.55	55.6	20.54	20.03	58.98	66.3	81.82	54.22	98.99	22.97	27.44	61.06	67.51
M americana	Rondônia	T206	NPC055	215.31	204.88	191.83	123.30	67.03	31.01	162.16	100.89	125.13	114.63	177.74	207.81	146.70	64.26	110.15	95.39	54.28	63.47	37.41	28.15	35.08	41.18	60.37	39.94	55.98	18.41	19.89	63.01	69.69	80.05	56.15	92.07	23.35	24.92	53.74	69.68
M americana	Rondônia	T211	NPC077	221.32	213.95	200.96	131.91	64.81	29.89	172.06	108.39	122.75	109.12	173.57	211.15	149.87	63.57	116.40	100.89	55.04	63.39	36.77	31.61	35.84	38.19	64.54	39.67	61.17	18.38	18.75	63.43	62.84	78.78	54.06	95.64	21.72	24.64	51.10	65.64
M americana	Rondônia	T269	NPC019	210.62	206.04	190.18	129.89	64.54	33.63	157.99	94.91	125.30	116.93	166.54	201.84	143.76	53.35	107.15	93.01	48.22	64.11	35.76	29.22	32.81	33.98	67.72	41.09	59.10	15.79	15.02	61.65	72.33	83.04	53.87	92.42	21.94	26.04	64.80	73.30
M americana	Rondônia	T342	NPC067	227.09	223.60	203.51	133.17	78.78	32.21	177.01	110.63	124.33	120.86	181.83	225.30	161.24	64.90	123.72	111.44	56.81	61.98	33.93	27.73	35.70	37.32	68.81	44.08	58.78	20.03	19.58	59.81	60.05	76.70	58.74	94.09	26.36	28.88	58.03	84.26
M bororo	.	NPC024	NPC024	187.03	173.5	153.33	110.67	59.02	32.31	138.86	88.97	106.61	102.55	184.5	161.97	132.9	58.0	97.0	76.05	44.98	59.32	32.8	26.8	32.22	31.9	59.52	34.02	50.71	17.7			55.54	81.62	53.01	91.02	20.54	27.21	62.91	48.02
M bororo	.	T338	NPC002	184.5	171.12	151.2	109.6	54.52	30.02	136.1	87.90	108.5	101.43	161.72	183.12	131.65	60.20	92.65	77.3	48.09	60.03	34.87	29.04	31.01	32.14	56.51	35.17	47.72	22.27			51.9	72.03	50.01	83.24	20.9	24.94	56.02	45.41
M bororo	.	T340	NPC01	205.1	191.54	176.47	118.67	62.11	32.01	149.45	88.34	119.5	116.4	167.89	192.54	138.82	55.09	101.54	81.03	49.56	55.92	30.87	24.6	31.07	31.65	68.02	32.54	53.01	19.5	17.54	57.08	56.71	76.66	50.12	81.92	17.32	24.01	56.02	47.61
M bororo	.	T412	NPC141	196.01	195.75	178.24	112.45	66.69	29.40	143.23	96.50	120.50	106.50	164.78	194.23	140.64	56.69	102.03	95.08	56.57	60.54	34.11	29.60	33.32	32.82	62.54	35.99	55.08	17.44	17.14	59.96	64.16	77.03	51.84	89.42	23.02	32.41	62.80	57.59
M nana	.	NPC020	NPC020	172.4	159.0	141.11	101.7	52.00	26.3	131.01	72.6	114.5	109.0	148.10	169.04	122.2	51.93	85.32	92.9	36.05	45.02	27.10	20.56	30.58	32.6	57.11	33.55	50.04	20.08			49.23	68.88	45.03	75.03	14.44	25.02	57.77	39.96
M nana	.	NPC114	NPC114	163.7	149.9	130.01	95.3	51.02	21.4	124.45	72.09	103.89	98.88	144.52	161.17	117.06	48.45	80.02	72.51	34.65	49.02	26.80	22.95	28.53	27.77	52.54	35.51	47.46	21.23			48.09	66.23	43.62	71.98	16.18	19.42	51.76	40.37
M nana	.	T304	NPC144	166.7	160.40	147.55	97.68	47.91	30.81	112.31	73.62	104.23	90.42	137.37	157.33	119.67	47.16	77.45	68.84	38.76	48.00	26.34	22.44	30.39	34.16	54.20	33.34	49.31	17.04	15.32	57.20	54.64	65.01	44.04	75.89	21.42	23.25	50.15	44.03
M nana	.	T406	NPC131	167.94	164.48	150.77	100.32	44.43	28.87	116.53	79.04	103.98	95.05	138.18	161.23	120.89	45.17	80.54	68.21	41.07	51.48	31.48	20.90	28.82	30.33	56.04	37.44	48.52	15.71	15.84	56.13	52.19	65.52	44.54	74.97	22.09	23.81		46.90
M temama	.	NPC095	NPC095	178.02	140.00	156.80	105.21	53.5	27.3	139.2	86.7	101.6	88.81	145.2	176.66	126.3	58.91	89.12	77.2	42.2	50.8	26.66	23.2	31.2	38.2	50.51	34.02	49.80	15.5	18.5	57.09	50.64	75.73	49.80	80.21	18.23	22.63	56.21	37.01
M temama	.	T362	NPC092				98.61	41.3				107.2	94.31	137.33		122.2	42.12				50.03	29.34	22.51	29.04	31.75	47.28	35.42	46.92	18.02	16.01	50.92	47.51	70.61	50.91	75.01	13.21		51.1	39.2
M temama	.	T363	NPC091	168.20				51.13			57.81	101.03	93.5	134.12		119.01	4.51	82.84	70.21	39.99	53.74	39.61	25.21	30.01	35.21									45.52	76.91	18.92	21.31	53.02
M temama	.	T366	NPC094	162.81	152.82	141.2	87.02	45.52	31.1	112.54	72.22	102.82	88.02	133.7	160.3	117.2	48.9	78.8	64.92	40.1	55.3	31.15	26.61	29.71	28.46	45.1	34.82	45.2	17.5	16.4	53.01	57.61	68.5	47.11	73.25	21.48	17.3	51.5	37.7
